# Supplementary material for: MAPT rs242562 and GSK3B rs334558 are associated with Parkinson’s Disease in central China
Source: PubMed Central journal article supplement (PMC4021090; doi:10.1186/1471-2202-15-54), 2014-04-29
Supplement: 1471-2202-15-54-S1.pdf [file 1471-2202-15-54-S1.pdf]

**Supplemental Table1. *MAPT* rs242562 A/G and risk of PD, by *GSK3B* rs334558 C/T**

| Variable             | AA vs. AG+GG          |        | AA vs. AG+GG          |        | GG vs. AG+AA                 |               | GG vs. AG+AA                 |               |
|----------------------|-----------------------|--------|-----------------------|--------|------------------------------|---------------|------------------------------|---------------|
|                      | Crude OR (95% CI)     | P      | Adjusted OR (95% CI)* | P      | Crude OR (95% CI)            | P             | Adjusted OR (95% CI)*        | P             |
| Genotype of rs334558 |                       |        |                       |        |                              |               |                              |               |
| CC                   | 0.655 (0.316 – 1.360) | 0.2566 | 0.643 (0.304 – 1.360) | 0.2484 | 0.775 (0.363 – 1.657)        | 0.5114        | 0.797 (0.365 – 1.742)        | 0.5696        |
| CT                   | 1.524 (0.853 – 2.726) | 0.1550 | 1.517 (0.845 – 2.723) | 0.1623 | <b>0.429 (0.219 – 0.841)</b> | <b>0.0138</b> | <b>0.420 (0.212 – 0.835)</b> | <b>0.0133</b> |
| TT                   | 0.714 (0.142 – 3.600) | 0.6835 | 0.509 (0.085 – 3.038) | 0.4584 | 0.311 (0.087 – 1.109)        | 0.0717        | 0.327 (0.079 – 1.356)        | 0.1233        |
| CT+TT                | 1.421 (0.838 – 2.407) | 0.1918 | 1.384 (0.813 – 2.355) | 0.2310 | <b>0.440 (0.245 – 0.788)</b> | <b>0.0058</b> | <b>0.470 (0.260 – 0.848)</b> | <b>0.0122</b> |
