# Supplementary material for: MAPT rs242562 and GSK3B rs334558 are associated with Parkinson’s Disease in central China
Source: PubMed Central journal article supplement (PMC4021090; doi:10.1186/1471-2202-15-54), 2014-04-29
Supplement: 1471-2202-15-54-S2.pdf [file 1471-2202-15-54-S2.pdf]

**Supplemental Table 2. *GSK3B* rs334558 C/T and risk of PD, by *MAPT* rs242562 A/G**

| Variable             | CC vs. CT+TT          |        | CC vs. CT+TT          |        | TT vs. CT+CC          |        | TT vs. CT+CC          |        |
|----------------------|-----------------------|--------|-----------------------|--------|-----------------------|--------|-----------------------|--------|
|                      | Crude OR (95% CI)     | P      | Adjusted OR (95% CI)* | P      | Crude OR (95% CI)     | P      | Adjusted OR (95% CI)* | P      |
| Genotype of rs242562 |                       |        |                       |        |                       |        |                       |        |
| GG                   | 1.500 (0.641 – 3.510) | 0.3498 | 1.559 (0.643 – 3.777) | 0.3258 | 0.748 (0.237 – 2.356) | 0.6196 | 0.700 (0.215 – 2.281) | 0.5540 |
| AG                   | 0.955 (0.547 – 1.667) | 0.8717 | 0.986 (0.563 – 1.727) | 0.9599 | 1.564 (0.658 – 3.717) | 0.3108 | 1.502 (0.629 – 3.587) | 0.3596 |
| AA                   | 0.520 (0.238 – 1.139) | 0.1022 | 0.532 (0.241 – 1.175) | 0.1184 | 0.722 (0.154 – 3.384) | 0.6797 | 0.661 (0.138 – 3.157) | 0.6038 |
| AG+AA                | 0.812 (0.532 – 1.241) | 0.3365 | 0.835 (0.545 – 1.279) | 0.4079 | 1.305 (0.666 – 2.554) | 0.4379 | 1.234 (0.627 – 2.428) | 0.5430 |
